# Supplementary material for: Mapping of Diabetes Susceptibility Loci in a Domestic Cat Breed with an Unusually High Incidence of Diabetes Mellitus
Source: PubMed Central journal article supplement (PMC7699364; doi:10.3390/genes11111369), 2020-11-19
Supplement: genes-11-01369-s001.pdf [file genes-11-01369-s001.pdf]

## SUUPPLEMENTARY MATERIAL

Article

# Mapping of Diabetes Susceptibility Loci in a Domestic Cat Breed with an Unusually High Incidence of Diabetes Mellitus

Lois Balmer <sup>1,2,†</sup>, Caroline Ann O'Leary <sup>3,†</sup>, Marilyn Menotti-Raymond <sup>4</sup>, Victor David <sup>5</sup>, Stephen O'Brien <sup>6,7</sup>, Belinda Penglis <sup>8</sup>, Sher Hendrickson <sup>9</sup>, Mia Reeves-Johnson <sup>3</sup>, Susan Gottlieb <sup>3</sup>, Linda Fleeman <sup>10</sup>, Dianne Vankan <sup>3</sup>, Jacquie Rand <sup>3,11,‡</sup> and Grant Morahan <sup>1,\*;‡</sup>

- <sup>1</sup> Centre for Diabetes Research, Harry Perkins Institute for Medical Research, University of Western Australia, Nedlands 6009, Australia; l.balmer@ecu.edu.au
  - <sup>2</sup> School of Medical and Health Sciences, Edith Cowan University, Joondalup, Perth 6027, Australia
  - <sup>3</sup> School of Veterinary Science, the University of Queensland, St. Lawrence 4343, Australia; c.oleary@uq.edu.au (C.A.O.); m.reevejohnson@uq.edu.au (M.R.-J.); susanalisongottlieb@gmail.com (S.G.); d.vankan@uq.edu.au (D.V.); j.rand@uq.edu.au (J.R.)
  - <sup>4</sup> Laboratory of Genomic Diversity, Center for Cancer Research (FNLCR), Frederick, MD 21702, USA; Marilyn.Menotti@gmail.com
  - <sup>5</sup> Laboratory of Basic Research, Center for Cancer Research (FNLCR), National Cancer Institute, Frederick, MD 21702, USA; davidvic@mail.nih.gov
  - <sup>6</sup> Laboratory of Genomics Diversity, Center for Computer Technologies, ITMO University, 197101 St. Petersburg, Russian Federation; lgdchief@gmail.com
  - <sup>7</sup> Guy Harvey Oceanographic Center, Halmos College of Arts and Sciences, Nova Southeastern University, Ft Lauderdale, FL 33004, USA
  - <sup>8</sup> IDEXX Laboratories East Brisbane, Queensland 4169, Australia; belinda.penglis@bigpond.com
  - <sup>9</sup> Department of Biology, Shepherd University, Shepherdstown, WV 25443, USA; shendric@shepherd.edu
  - <sup>10</sup> Animal Diabetes Australia, Melbourne, Victoria 3155, Australia; l.fleeman@AnimalDiabetesAustralia.com.au
  - <sup>11</sup> American College of Veterinary Internal Medicine, University of Zurich, 8006 Zurich, Switzerland
- \* Correspondence: grant.morahan@perkins.org.au  
† These authors contributed equally to this work.  
‡ Joint senior authors.

**Supplementary Table 1. Nucleotide Sequence of Primers used for Genotyping Candidate SNPs.**

All sequences are listed from 5' to 3'. SNPs are listed as specified on the original Illumina chip used for genotyping, annotated with chromosome number and base position from the cat assembly. The genotyping method was performed by differential digest of restriction enzymes shown, or by allele specific PCR (ASP, where the allelic SNP is shown in lower case in the forward primer) or by high resolution melting (HRM).

| SNP Name | Primer sequences          |                        | Chromosome Position       | Amplicon Size (bp) | Alleles | Method  |
|----------|---------------------------|------------------------|---------------------------|--------------------|---------|---------|
| SNP1     | CGTGTGCTTGGCATATATCAG     | CCAAAACTCTGGGAAC TGC   | chrA3:109955841+109956008 | 168                | T/C     | HpyCH4V |
| SNP2     | AAACTCCGACTCCTCGTGTa      | GCAAGAGACAACGTGCAAGG   | chrA3:134626269+134626401 | 133                | A/G     | ASP     |
| SNP3     | GCCCCAGATATGTCAAGACC      | CGTGACAAGCATTGTTCCCTG  | chrC1:23237549+23237718   | 170                | T/C     | Aci1    |
| SNP4     | ACATTCCAGGGAGTCGTGAG      | GCTGGCTGTACACAGGATTG   | chrC2:83660239+83660383   | 145                | T/C     | Bsr1    |
| SNP5     | CTGGCCCAGAACCTAGGAG       | CTCTGGAAAAGCCCATTGTG   | chrC2:84129732+84129896   | 165                | T/C     | Bcc1    |
| SNP6     | GAAAAGCCTAAGATTTACTGACCAG | GGGGCAATTCATGAGACAGATC | chrC2:84135455+84135615   | 183                | A/C     | HRM     |
| SNP7     | GGGTCACATGCATTCAGCTA      | CATAAGAGCTGATAATGAGGGT | chrD2:88458324+88458478   | 155                | G/A     | HRM     |

**Supplementary Table 2. Primers used to amplify and sequence fragments of candidate genes.**

The number following the primer name (SLC8A1-\*) indicates a combined exon/intron region, this may often encompass more than one exon and/or intron; the initial and final number may also include some 5' and 3' untranslated region, respectively.

| Primer Name          | Primer sequences      |                        | Chr. Position             | Amplicon Size (bp) |
|----------------------|-----------------------|------------------------|---------------------------|--------------------|
| <b>E2f6 promoter</b> | TAGCAAGGGGTGAGCATTTTC | AACTTGGATGCGAGAAAAGC   | chrA3:134624551+134624868 | 318                |
| <b>E2f6-1</b>        | CCCCAGGGAGAATAAAAAACC | CCCACAACCTCACAAAGTGTTF | chrA3:134624873+134625193 | 321                |
| <b>E2f6-2</b>        | ATTTTCGATGGGTGTCTATGC | ACTTATGTACTCTGTGCGAC   | chrA3:134628717+134629223 | 507                |
| <b>E2f6-3</b>        | CTAACTGCGTCTTCACCTC   | TTAAAGTAACCTCTGCCTTGG  | chrA3:134630659+134630990 | 332                |
| <b>E2f6-4</b>        | TCCGGAAATTGTCACCATAG  | CAAGCACATACTCTGGAGAC   | chrA3:134632242+134632940 | 699                |
| <b>E2f6-5</b>        | CAGTATCCCTTGAATTGGCC  | GGCTAAACTACCTTGTCTGTC  | chrA3:134635371+134635984 | 614                |
| <b>E2f6-6</b>        | CTGTGCCATTGACAGAACG   | TGGAAATGTGGGACTAGAGC   | chrA3:134636168+134637350 | 1183               |
| <b>ETV5-1</b>        | CTCGGACCAATGAGAACCAG  | TAGAAAGTGCACCCGACTT    | chrC2:83644016+83644397   | 382                |
| <b>ETV5-2</b>        | TATAGGGAGCGGTTAGTAGC  | AGTTTCCACGCATGGATGT    | chrC2:83647112+83648153   | 1042               |
| <b>ETV5-3</b>        | CCAGTTCAGGGTTTGCAG    | ATCCCTCCCTAGAAGCCAC    | chrC2:83672298+83672793   | 496                |
| <b>ETV5-4</b>        | AACGTGGACTGCAACCTAGC  | GGAGTGCCTCAAGAACAGGT   | chrC2:83673335+83673897   | 563                |
| <b>ETV5-5</b>        | GGAAGAGGGTGCCTGAACTT  | TGAAGCTAGGGCAGGACTA    | chrC2:83685232+83685933   | 702                |
| <b>ETV5-6</b>        | TGAATGTGACCATCCGCTG   | GGAAGCTGAGCATGTTAAGC   | chrC2:83687181+83687722   | 542                |
| <b>ETV5-7</b>        | CTTCCCCGAGTCTTAGCTC   | AAGAAGTCCGAGCCATTG     | chrC2:83691970+83692781   | 812                |
| <b>ETV5-8</b>        | CACCTCTTAGCAGTTGTGAC  | GTTTCTGTGTACCCAAGAGC   | chrC2:83696772+83697288   | 517                |
| <b>ETV5-9</b>        | CCCCATGCCCTGTTCAG     | GCCTGTTTTCTTCCGCTCAC   | chrC2:83702021+83703906   | 1886               |
| <b>Liph-1</b>        | TCGACCTTCCACTGAAAAGAG | CTGAAGGGAGTGGGCTGATA   | chrC2:84116297+84116638   | 342                |
| <b>Liph-2</b>        | CTAGATCCAGCCTCTGTCTG  | AGTGCACAACCTGCACAACC   | chrC2:84134561+84135238   | 678                |
| <b>Liph-3</b>        | GGCCTCAGTTTCTCATCTG   | AAGGAAGATCGCTGTTTGGGA  | chrC2:84136081+84136717   | 637                |
| <b>Liph-4</b>        | TTATCCCCATGTCCCTGGTC  | TCCACTCCAGCAAGACATCC   | chrC2:84142106+84142704   | 599                |
| <b>Liph-5</b>        | ACTGACCCAAACTCCCTTAC  | GGTTTGCTTCCATATCTTCG   | chrC2:84143918+84144467   | 550                |
| <b>Liph-6</b>        | TAAGCTGAGTCTCAATGTGC  | GCTTGAAAACCTTTTGGAAC   | chrC2:84147098+84147785   | 688                |
| <b>Liph-7</b>        | TGACAACCTGGAGACCCTGG  | ATCCTTCACAGCAAGCAAGG   | chrC2:84150491+84151162   | 672                |
| <b>Liph-8</b>        | GCATGCCTCTCTGTGACC    | CTTGCAAGCAGTGTGGGTG    | chrC2:84159419+84160060   | 642                |
| <b>Liph-9</b>        | GTTGTTGATGTGGGCTATGC  | AGTTTGAGACAGCCAGAGTG   | chrC2:84161025+84162370   | 1346               |
| <b>SLC8A1-1</b>      | CCACACGGAGAATCCTTCAG  | CGCAAGGCAGAACCCTAAC    | chrA3:109917045+109917340 | 296                |
| <b>SLC8A1-2a</b>     | GGATCTGGCTCTGATGGTGT  | GTCTTGGAAGATGGCCTGTC   | chrA3:109937002+109937953 | 952                |
| <b>SLC8A1-2b</b>     | TCGCTTGGGTAGCAGATAGG  | ATGCATACGCTCTCCCATTC   | chrA3:109937836+109938967 | 1132               |
| <b>SLC8A1-3</b>      | GGAGCTATGCATTTGGGTGAC | GAAGAGTGCAGGCATCCAG    | chrA3:110181615+110181989 | 375                |
| <b>SLC8A1-4</b>      | TGCCTGGATTTCTTTCTGTC  | ATGTGCCACGGCTAAATG     | chrA3:110184954+110185758 | 805                |
| <b>SLC8A1-5</b>      | TCTGGTAGCAAACCAGTGC   | TTGATGACCCACCATACTCC   | chrA3:110189456+110189753 | 298                |
| <b>SLC8A1-6</b>      | CTCCGGCCTTATGATCTCAC  | TGAGCCAGTTCCCTGACATTG  | chrA3:110194028+110194389 | 362                |
| <b>SLC8A1-7</b>      | TGAGCCTAACATCCCCTACC  | TTTACCCTGGAAGGTCGTTG   | chrA3:110198110+110198436 | 327                |
| <b>SLC8A1-8</b>      | CCACTGTGAGGGGGTATGTC  | AGGTCAGGAAGGCACATGG    | chrA3:110221496+110222022 | 527                |
| <b>SLC8A1-9</b>      | GAAGCTTCCAGTGCTCCAC   | CTTGAAGCTGGGTTCCATC    | chrA3:110244193+110244768 | 576                |
| <b>Traf2b-1</b>      | GAGCGCTTCGGTACTCAGC   | TTCCAGCCTCAGACTTCG     | chrC2:83775198+83775481   | 284                |
| <b>Traf2b-2</b>      | AGTTTCAGTTTGGCACTGG   | CTGGAAGCACTTCTTTGTC    | chrC2:83781476+83781927   | 452                |
| <b>Traf2b-3</b>      | TTATCTTGGAAGGGGATTGTC | GCACACACCAATTTCAAAGC   | chrC2:83786698+83787000   | 303                |
| <b>Traf2b-4</b>      | TGGAAGAGAGCAAGTAGTGG  | CCAAGAGTGTTTTGATGAGG   | chrC2:83787790+83788383   | 594                |
| <b>Traf2b-5</b>      | CTGCCATTCTTAATGCTTG   | GTGAGACTGGATGAAATGC    | chrC2:83788641+83789399   | 759                |
| <b>Traf2b-6</b>      | AAAGGGTGGCAAATGTAGC   | CACAACTGAGGGCAGTAG     | chrC2:83792358+83793305   | 948                |
| <b>Traf2b-7</b>      | TCCCTGTAGAGAATCTGGTG  | TTTAGCCCAAGGGATACTG    | chrC2:83793562+83794786   | 1225               |
| <b>Traf2b-8</b>      | AAATAAGCCATGCTGCTGCT  | TGTTGCAACTGATTACAGAGA  | chrC2:83790344+83790615   | 272                |

|             |                       |                       |                         |     |
|-------------|-----------------------|-----------------------|-------------------------|-----|
| DGKG_ex1    | CCCTGGTGAACAAAACCTCCA | CTGTCAGGCCCACTCTCATT  | chrC2:83451030+83451269 | 240 |
| DGKG_ex2    | AGTCTCGGGAATGAGGGATT  | ATAATTCAGGGAGCACCAA   | chrC2:83463397+83463728 | 332 |
| DGKG_ex3    | GTCCCTTTGCTTCTCTGCAC  | TCTCATTTCCACCCCGTAAG  | chrC2:83471640+83471979 | 340 |
| DGKG_ex4    | ACAGTCAGCCCAACAAATC   | ATGAACCCGCATCAAGACTC  | chrC2:83472289+83472699 | 411 |
| DGKG_ex5    | AATGGGCTCCATTCAGAGAG  | AAGCAGGCATCACCAGTACC  | chrC2:83480505+83480975 | 471 |
| DGKG_ex6    | GGGTAACTGGCTGCAATAA   | TTTTGTGATCCTGGGCTTCT  | chrC2:83485433+83485849 | 417 |
| DGKG_ex7    | CTGGGGTTGGATTTTGAGAA  | ACTCCGGTGGAAAGGTTAGG  | chrC2:83489427+83489795 | 369 |
| DGKG_ex8    | GCAGAACCAGAGAGGAGTG   | TTTGGGCTGGCCTAGAGTA   | chrC2:83490008+83490495 | 488 |
| DGKG_ex9    | GCCAACCATGTAGGAGAGGT  | GCACCTAGACTCTGCCTGGA  | chrC2:83494723+83495185 | 463 |
| DGKG_ex10   | GAGGTGGCAGATGGTTAGA   | CCCACTAGCCTCCACAGTTC  | chrC2:83496580+83496987 | 408 |
| DGKG_ex11   | GAGCAGCCCATATCCACTA   | GGTGATTCAGTGGAGGCACT  | chrC2:83499628+83500063 | 436 |
| DGKG_ex12   | TCTGAACCCTCACCCTTGAC  | GGCAATGACCGTTCAAACCTT | chrC2:83500816+83501116 | 301 |
| DGKG_ex13   | GATCCAAAGCCCTGTTTTGA  | ACCTCCCCTTTTCAACACTT  | chrC2:83502554+83502979 | 426 |
| DGKG_ex14   | CCTGCTGGCTGAAAAAGAAC  | ACCAAGGCACAGGGATGTTA  | chrC2:83505118+83505418 | 301 |
| DGKG_ex15   | TCTTCTCCCTCTTGGGTTT   | AGGGTAAATGGCAGGAAGG   | chrC2:83506251+83506590 | 340 |
| DGKG_ex16   | TCAGGGCCGTAACATACTCC  | CCCAAGAGTGGAAACAAGGA  | chrC2:83509323+83509641 | 319 |
| DGKG_ex17   | CCCAAAGGACAGAATTTGGA  | GAGCATCCCTTGAAATTTGGA | chrC2:83513632+83514050 | 419 |
| DGKG_ex18   | GGCTTCCAAATCTCCCATTT  | GGGGACAACAGAAGACCAGA  | chrC2:83516074+83516533 | 460 |
| DGKG_ex19   | TAGCCCTAACCTTGACCT    | TCTGCTTGAAATGGAAAC    | chrC2:83525506+83525931 | 426 |
| DGKG_ex20   | TCTGAGTCTTTGCCGGAAC   | TAGCGGTGTTGGGAATAGG   | chrC2:83554394+83554820 | 427 |
| DGKG_ex21   | CCTTGGGTTGGGATACACTG  | TTTGCTAATAGGCCACCTG   | chrC2:83575476+83575787 | 312 |
| DGKG_ex22   | TCTGACCACAACCATCTGA   | GCTTCTGTCCGTCACTCTCC  | chrC2:83597003+83597305 | 303 |
| DGKG_ex23   | AAGTGGGCTCAGCAATCTGT  | GGTACCTGAATGGGTGGATG  | chrC2:83599419+83599806 | 388 |
| DGKG_ex24   | TGTCTCTCCCAGTGTTC     | TTGGTTTAACTGGCATTTGG  | chrC2:83609641+83609990 | 350 |
| IGFBP2_ex1  | GGAGGAGGAGGAGAGACGA   | CGAGAGTTGAGGCTCTGGTG  | chrC2:83905414+83905827 | 414 |
| IGFBP2_ex2  | GTTAGCGGAATGGAGAGGTG  | CCCCAATAAGGCACCAGATA  | chrC2:83906895+83907534 | 640 |
| IGFBP2_ex3  | GGTCAGTTGCAGGACCATCT  | AGACAGAACAGGAGGGCTCA  | chrC2:84019892+84020545 | 654 |
| IGFBP2_ex4  | AAAAACAACTGCCCAATG    | TTGGAGTTGACCCAGCCTAT  | chrC2:84020845+84021518 | 674 |
| IGFBP2_ex5  | TGGCTTGTCAAAAATCATGG  | CACAGGTCCACCTCAGTTT   | chrC2:84024654+84025277 | 624 |
| IGFBP2_ex6  | ATCAGCTCTGAGGGAGCAAA  | CACTGTGAAGTCCCCAGCTT  | chrC2:84026875+84027492 | 618 |
| IGFBP2_ex8  | TCTGGCTGGTGTCTTCTCTT  | ACTGGATTCCCTCACCACAC  | chrC2:84037691+84038377 | 687 |
| IGFBP2_ex9  | GGCAAGTATTTGATGCGACA  | GCCTTCCATTTTGCTCCATA  | chrC2:84038336+84038955 | 620 |
| IGFBP2_ex10 | GGGCAACTACACAGGCAAGT  | AACTCTGGGTGCTGAGCTA   | chrC2:84040387+84041058 | 672 |
| IGFBP2_ex11 | ATTTGCTGGCCGTGAATAAC  | TGCCACCTGTGGATTTGTAA  | chrC2:84051591+84052225 | 635 |
| IGFBP2_ex12 | GCACCATTTTGACCATTTCC  | GATTAATCTTGGGGCCAAT   | chrC2:84052746+84053151 | 406 |
| IGFBP2_ex13 | GAACTCCTTGCACTGCTTCC  | AAATGCATCCGACCAAACTC  | chrC2:84056145+84056830 | 686 |
| IGFBP2_ex14 | ACAGCCAGTCTCTGAAGGA   | GGGAGAGTGTAGGACACCA   | chrC2:84057657+84058310 | 654 |
| IGFBP2_ex15 | GGCAGGGATGAAAATGAAGA  | TGAGATGTGCTTGGCTTGAC  | chrC2:84059224+84059919 | 696 |
| IGFBP2_ex16 | GCGGGTAGACAACAGTTTCC  | TTCTCAGGATGGTCTTTGG   | chrC2:84061175+84061522 | 348 |

### Supplementary Table 3 Search for Polymorphisms within Candidate Genes.

“Amplicon” refers to the number of the amplicon of genes for which multiple exons were amplified and sequenced. Sequences were analysed using Sequence Scanner 2 software (Applied Biosystems, Victoria, Australia). Sequences with SNPs identified were aligned using ClustalW2 (EMBL-EBI, United Kingdom). Protein sequences encoded by missense SNPs in were submitted to the Protein Variation Effect Analyzer (PROVEAN) protein prediction software (Rockville, MD, USA) (Choi Y, 2012) and the predicted Effect on protein function is shown.

“Status” indicates results from testing novel variants discovered by comparing sequences from ABB cats to the reference cat genome. Where the novel SNP allele was found in other ABB cats, both diabetic and non-diabetic, it is indicated as “Burmese SNP”, a variant that may be specific to that cat breed. “T2D associated” indicates that the novel SNP allele was significantly over-represented in diabetic ABB cats compared to non-diabetic ABB cats.

| Gene          | Amplicon | Variant Position  | SNP | Amino acid change | Effect      | Position    | Status      |
|---------------|----------|-------------------|-----|-------------------|-------------|-------------|-------------|
| <i>SLC8A1</i> | 1        | <b>None Found</b> |     |                   |             |             |             |
|               | 2a       | chrA3:109937274   | C/T | no change         |             | Exon        |             |
|               | 2a       | chrA3:109937721   | C/T | no change         |             | Exon        |             |
|               | 2a       | chrA3:109937722   | T/C | W->R              | Del -13.997 | Exon        | Burmese SNP |
|               | 2a       | chrA3:109937809   | T/C | F->S              | Del -7.300  | Exon        | Burmese SNP |
|               | 2b       | chrA3:109938205   | C/T | no change         |             | Exon        |             |
|               | 2b       | chrA3:109938642   | T/C | no change         |             | Exon        |             |
|               | 3        | chrA3:110181758   | A/T |                   |             | Intron      |             |
|               | 4        | chrA3:110185140   | C/T |                   |             | Intron      |             |
|               | 4        | chrA3:110185198   | G/A |                   |             | Intron      |             |
|               | 4        | chrA3:110185500   | C/T |                   |             | Intron      |             |
|               | 5        | chrA3:110189622   | T/C |                   |             | Intron      |             |
|               | 6        | <b>None Found</b> |     |                   |             |             |             |
|               | 7        | <b>None Found</b> |     |                   |             |             |             |
|               | 8        | <b>None Found</b> |     |                   |             |             |             |
|               | 9        | <b>None Found</b> |     |                   |             |             |             |
| <i>E2F6</i>   | 5'UTR    | chrA3:134624635   | A/G | no change         |             | 5'UTR       |             |
|               | 1        | chrA3:134624897   | A/G |                   |             | Intron      |             |
|               | 2        | <b>None Found</b> |     |                   |             |             |             |
|               | 3        | chrA3:134630855   | A/G | E->K              | Del -2.529  | Exon        | Burmese SNP |
|               | 4        | chrA3:134632649   | A/G |                   |             | Splice site | Burmese SNP |
|               | 4        | chrA3:134632780   | T/G |                   |             | Intron      |             |
|               | 4        | chrA3:134632849   | T/C |                   |             | Intron      |             |
|               | 4        | chrA3:134632875   | A/C |                   |             | Intron      |             |
|               | 5        | chrA3:134635794   | G/T |                   |             | Intron      |             |
|               | 5        | chrA3:134635802   | A/T |                   |             | Intron      |             |
|               | 6        | chrA3:134636471   | A/G |                   |             | Intron      |             |
|               | 6        | chrA3:134636600   | G/C | no change         |             | Exon        | Burmese SNP |

|                |    |                   |                     |           |            |        |             |
|----------------|----|-------------------|---------------------|-----------|------------|--------|-------------|
|                | 6  | chrA3:134636631   | T/C                 |           |            | 3' UTR |             |
| <b>ETV5</b>    | 1  | <b>None Found</b> |                     |           |            |        |             |
|                | 2  | chrC2:83647185    | A/G                 |           |            | Intron |             |
|                | 2  | chrC2:83647798    | A/G                 |           |            | Intron |             |
|                | 2  | chrC2:83647821    | CCCCA<br>(Deletion) | no change |            | Intron | Burmese SNP |
|                | 3  | <b>None Found</b> |                     |           |            |        |             |
|                | 4  | chrC2:83673383    | G/A                 |           |            | Intron |             |
|                | 5  | <b>None Found</b> |                     |           |            |        |             |
|                | 6  | chrC2:83687387    | G/A                 |           |            | Intron |             |
|                | 6  | chrC2:83687540    | G/T                 |           |            | Intron |             |
|                | 6  | chrC2:83687690    | C/T                 |           |            | Intron |             |
|                | 7  | chrC2:83692059    | G/C                 |           |            | Intron |             |
|                | 7  | chrC2:8369228     | C/T                 |           |            | Intron |             |
|                | 7  | chrC2:83692322    | G/A                 |           |            | Intron |             |
|                | 8  | <b>None Found</b> |                     |           |            |        |             |
|                | 9  | chrA2: 83702092   | C/T                 | A->T      | Del -5.000 | Exon   | Burmese SNP |
|                | 9  | chrA2: 83702188   | C/T                 | I->V      | Neu -1.000 | Exon   |             |
|                | 9  | chrA2: 83702263   | C/T                 | N->D      | Del -6.000 | Exon   | Burmese SNP |
|                | 9  | chrA2: 83702303   | A/G                 |           |            | 3' UTR |             |
| <b>IGF2BP2</b> | 1  | <b>None Found</b> |                     |           |            | 5'UTR  |             |
|                | 2  | chrC2:84133261    | C/G                 |           |            | Intron |             |
|                | 3  | <b>None Found</b> |                     |           |            |        |             |
|                | 4  | chrC2:84247187    | G/A                 |           |            | Intron |             |
|                | 4  | chrC2:84247191    | G/A                 |           |            | Intron |             |
|                | 4  | chrC2:84247209    | C/A                 |           |            | Intron |             |
|                | 5  | chrC2:84250826    | T/delT              |           |            | Intron |             |
|                | 6  | chrC2:84252889    | A/G                 |           |            | Intron |             |
|                | 6  | chrC2:84253250    | C/T                 |           |            | Intron |             |
|                | 7  | chrC2:84255023    | C/T                 |           |            | Intron |             |
|                | 7  | chrC2:84255083    | C/G                 | V->V      |            | Exon   |             |
|                | 7  | chrC2:84255259    | C/T                 |           |            | Intron |             |
|                | 7  | chrC2:84255336    | G/A                 |           |            | Intron |             |
|                | 8  | chrC2:84263856    | G/A                 |           |            | Intron |             |
|                | 8  | chrC2:84266774    | C/A                 |           |            | Intron |             |
|                | 9  | <b>None Found</b> |                     |           |            |        |             |
|                | 10 | chrC2:84266774    | C/A                 |           |            | Intron |             |
|                | 11 | chrC2:84277808    | G/A                 |           |            | Intron |             |
|                | 11 | chrC2:84277866    | G/A                 |           |            | Intron |             |
|                | 11 | chrC2:84277974    | G/A                 |           |            | Intron |             |
|                | 11 | chrC2:84278137    | G/A                 |           |            | Intron |             |
|                | 12 | chrC2:84278804    | G/T                 |           |            | Intron |             |
|                | 12 | chrC2:84278806    | G/A                 |           |            | Intron |             |

|             |    |                   |                 |           |           |             |                       |
|-------------|----|-------------------|-----------------|-----------|-----------|-------------|-----------------------|
|             | 12 | chrC2:84278963    | T/G             |           |           | Intron      |                       |
|             | 13 | <b>None Found</b> |                 |           |           |             |                       |
|             | 14 | chrC2:84283914    | C/T             | H->H      | Neu       | Exon        |                       |
|             | 15 | <b>None Found</b> |                 |           |           |             |                       |
|             | 16 | chrC2:84287279    | C/T             |           |           | 3' UTR      |                       |
| <b>LIPH</b> |    |                   |                 |           |           |             |                       |
|             | 1  | chrC2:84116405    | C/A             |           |           | Promoter    |                       |
|             | 1  | chrC2:84116432    | T/A             |           |           | Pro/5'UTR   |                       |
|             | 2  | chrC2:84134822    | G/T             | L->F      | Neu 0.822 | Exon        |                       |
|             | 3  | <b>None Found</b> |                 |           |           |             |                       |
|             | 4  | <b>None Found</b> |                 |           |           |             |                       |
|             | 5  | <b>None Found</b> |                 |           |           |             |                       |
|             | 6  | <b>None Found</b> |                 |           |           |             |                       |
|             | 7  | <b>None Found</b> |                 |           |           |             |                       |
|             | 8  | chrC2:84159595    | C/T             |           |           | Splice site | Burmese SNP           |
|             | 9  | chrC2:84161272    | G/A             | no change |           | Exon        |                       |
|             | 9  | chrC2:84161404    | C/T             |           |           | Intron      |                       |
|             | 9  | chrC2:84161783    | C/A             |           |           | Intron      |                       |
|             | 9  | chrC2:84162155    | C/T             |           |           | 3' UTR      | <b>T2D Associated</b> |
| <b>DGKG</b> |    |                   |                 |           |           |             |                       |
|             | 1  | <b>None Found</b> |                 |           |           |             |                       |
|             | 2  | chrC2:83694887    | C/T             |           |           | Intron      |                       |
|             | 3  | <b>None Found</b> |                 |           |           |             |                       |
|             | 4  | chrC2:83703769    | T / delT        |           |           | Intron      |                       |
|             | 4  | chrC2:83703775    | T/C             |           |           | Intron      |                       |
|             | 4  | chrC2:83703876    | T/C             |           |           | Intron      |                       |
|             | 4  | chrC2:83704029    | T/C             |           |           | Intron      |                       |
|             | 5  | chrC2:83712162    | G/A             | No change |           | Exon        |                       |
|             | 6  | chrC2:83717084    | C/T             |           |           | Intron      |                       |
|             | 6  | chrC2:83717181    | C/A             |           |           | Intron      |                       |
|             | 6  | chrC2:83717180    | C/insC          |           |           | Intron      |                       |
|             | 6  | chrC2:83717181    | A/C             |           |           | Intron      |                       |
|             | 6  | chrC2:83717196    | C/T             |           |           | Intron      |                       |
|             | 6  | chrC2:83717228    | G/A             |           |           | Intron      |                       |
|             | 7  | chrC2:83721012    | T/C             |           |           | Intron      |                       |
|             | 7  | chrC2:83721018    | C/T             |           |           | Intron      |                       |
|             | 7  | chrC2:83721122    | T/insATAC<br>CT |           |           | Intron      |                       |
|             | 7  | chrC2:83721181    | A/G             |           |           | Intron      |                       |
|             | 8  | chrC2:83721458    | A/G             |           |           | Intron      |                       |
|             | 8  | chrC2:83721889    | C/A             |           |           | Intron      |                       |
|             | 9  | chrC2:83726158    | C/T             |           |           | Intron      |                       |
|             | 9  | chrC2:83726168    | C/T             |           |           | Intron      |                       |
|             | 9  | chrC2:83726368    | G/A             |           |           | Intron      |                       |
|             | 9  | chrC2:83726564    | A/G             |           |           | Intron      |                       |

|               |    |                   |                 |  |  |        |  |
|---------------|----|-------------------|-----------------|--|--|--------|--|
|               | 10 | <b>None Found</b> |                 |  |  |        |  |
|               | 11 | chrC2:83731319    | C/T             |  |  | Intron |  |
|               | 11 | chrC2:83731366    | T/C             |  |  | Intron |  |
|               | 12 | <b>None Found</b> |                 |  |  |        |  |
|               | 13 | <b>None Found</b> |                 |  |  |        |  |
|               | 14 | <b>None Found</b> |                 |  |  |        |  |
|               | 15 | <b>None Found</b> |                 |  |  |        |  |
|               | 16 | chrC2:83740952    | C/A             |  |  | Intron |  |
|               | 16 | chrC2:83740954    | C/T             |  |  | Intron |  |
|               | 17 | <b>None Found</b> |                 |  |  |        |  |
|               | 18 | chrC2:83747554    | T/C             |  |  | Intron |  |
|               | 18 | chrC2:83747903    | G/T             |  |  | Intron |  |
|               | 19 | chrC2:83757168    | C/A             |  |  | Intron |  |
|               | 20 | chrC2:83786172    | G/A             |  |  | Intron |  |
|               | 21 | <b>None Found</b> |                 |  |  |        |  |
|               | 22 | chrC2:83828611    | T/A             |  |  | Intron |  |
|               | 22 | chrC2:83828855    | T/C             |  |  | Intron |  |
|               | 23 | <b>None Found</b> |                 |  |  | Intron |  |
|               | 24 | <b>None Found</b> |                 |  |  |        |  |
|               | 25 | chr2C:84020439    | Del G           |  |  | Intron |  |
|               | 26 | chr2C:84020441    | T/A             |  |  | Intron |  |
|               | 27 | chrC2:84023436    | G/A             |  |  | 3' UTR |  |
|               |    |                   |                 |  |  |        |  |
| <i>Traf2b</i> | 1  | <b>None Found</b> |                 |  |  |        |  |
|               | 2  | <b>None Found</b> |                 |  |  |        |  |
|               | 3  | <b>None Found</b> |                 |  |  |        |  |
|               | 4  | <b>None Found</b> |                 |  |  |        |  |
|               | 5  | chrC2:83789071    | T/A             |  |  | Intron |  |
|               | 5  | chrC2:83789069    | G<br>(Deletion) |  |  | Intron |  |
|               | 6  | chrC2:83792653    | A/G             |  |  | Intron |  |
|               | 7  | <b>None Found</b> |                 |  |  |        |  |
|               | 8  | <b>None Found</b> |                 |  |  |        |  |



### Supplementary Table 4. Testing Novel SNPs for Association with Type 2 Diabetes

Selected SNPs from Supp. Table 3 were tested in the diabetic and non-diabetic cats. Amplicon numbers, chromosome positions and base numbers are shown as in the legend of that Table. Genotypes for all SNPs were analysed using the “-assoc” function in Plink. A1 indicates the minor allele (i.e. least frequently observed based on the whole sample); F\_A and F\_U indicate the frequency of the minor allele in the affected and unaffected cats, respectively. The P value is shown calculated using Fisher’s Exact test. The Odds Ratio (OR) was also calculated by Plink.

| Gene          | Amplicon | CHR | BP        | A1 | F_A  | F_U  | A2 | CHISQ | P        |
|---------------|----------|-----|-----------|----|------|------|----|-------|----------|
| <i>ETV5</i>   | 9        | C2  | 83702092  | C  | 0.40 | 0.25 | T  | 0.45  | 0.50     |
| <i>ETV5</i>   | 9        | C2  | 83702188  | C  | 0.40 | 0.13 | T  | 1.68  | 0.20     |
| <i>ETV5</i>   | 9        | C2  | 83702263  | T  | 0.32 | 0.35 | C  | 0.14  | 0.71     |
| <i>ETV5</i>   | 9        | C2  | 83702303  | A  | 0.40 | 0.13 | G  | 1.68  | 0.20     |
| <i>LIPH</i>   | 2        | C2  | 84134822  | C  | 0.10 | 0.67 | A  | 5.61  | 0.02     |
| <i>LIPH</i>   | 8        | C2  | 84159595  | T  | 0.50 | 0.40 | C  | 0.18  | 0.67     |
| <i>LIPH</i>   | 9        | C2  | 84162155  | T  | 0.21 | 0.03 | C  | 18.65 | 1.57E-05 |
| <i>SLC8A1</i> | 2        | C3  | 109937722 | C  | 0.01 | 0.02 | T  | 0.14  | 0.71     |
| <i>E2F6</i>   | 3        | C3  | 134630855 | A  | 0.08 | 0.07 | G  | 0.01  | 0.91     |
| <i>E2F6</i>   | 4        | C3  | 134632649 | G  | 0.19 | 0.29 | A  | 0.40  | 0.53     |
| <i>E2F6</i>   | 6        | C3  | 134636600 | G  | 0.25 | 0.13 | C  | 0.47  | 0.49     |
